# Supplementary material for: Gibberellin deficiency is responsible for shy-flowering nature of Epipremnum aureum
Source: PubMed Central journal article supplement (PMC4921968; doi:10.1038/srep28598), 2016-06-27
Supplement: srep28598-s1.pdf [file srep28598-s1.pdf]

## Supplementary Information

### Gibberellin deficiency is responsible for shy-flowering nature of *Epipremnum aureum*

Chiu-Yueh Hung<sup>1†</sup>, Jie Qiu<sup>2†</sup>, Ying-Hsuan Sun<sup>3</sup>, Jianjun Chen<sup>4</sup>, Farooqahmed S. Kittur<sup>1</sup>, Richard J. Henny<sup>4</sup>, Gulei Jin<sup>2</sup>, Longjiang Fan<sup>2\*</sup>, Jiahua Xie<sup>1\*</sup>

\*: Correspondence and requests for materials should be addressed to J.X. (jxie@nccu.edu) or L.F. (fanlj@zju.edu.cn).

#### **This PDF file includes**

Supplementary Figs. 1 to 5

Supplementary Tables S1, S4-S6

#### **Other Supplementary Material for this manuscript includes the following:**

**Supplementary Table S2. The 20 genomes of angiosperm species used in this study**

**Supplementary Table S3. Single copy orthologs from *E. aureum* and other 20 angiosperm species**

**Supplementary Table S7. Full names of Arabidopsis genes used and their corresponding *E. aureum* orthologs**

**Supplementary Table S8. Primers for qRT-PCR, PCR and RT-PCR**

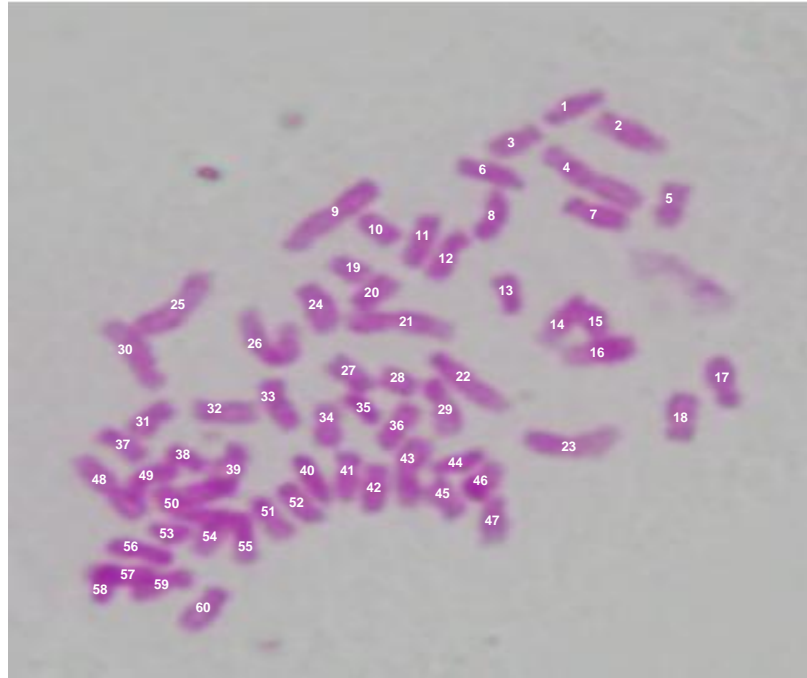

**Supplementary Figure S1. Chromosome number.** A total of 60 metaphase chromosomes were observed in a root-tip cell (x 2000).

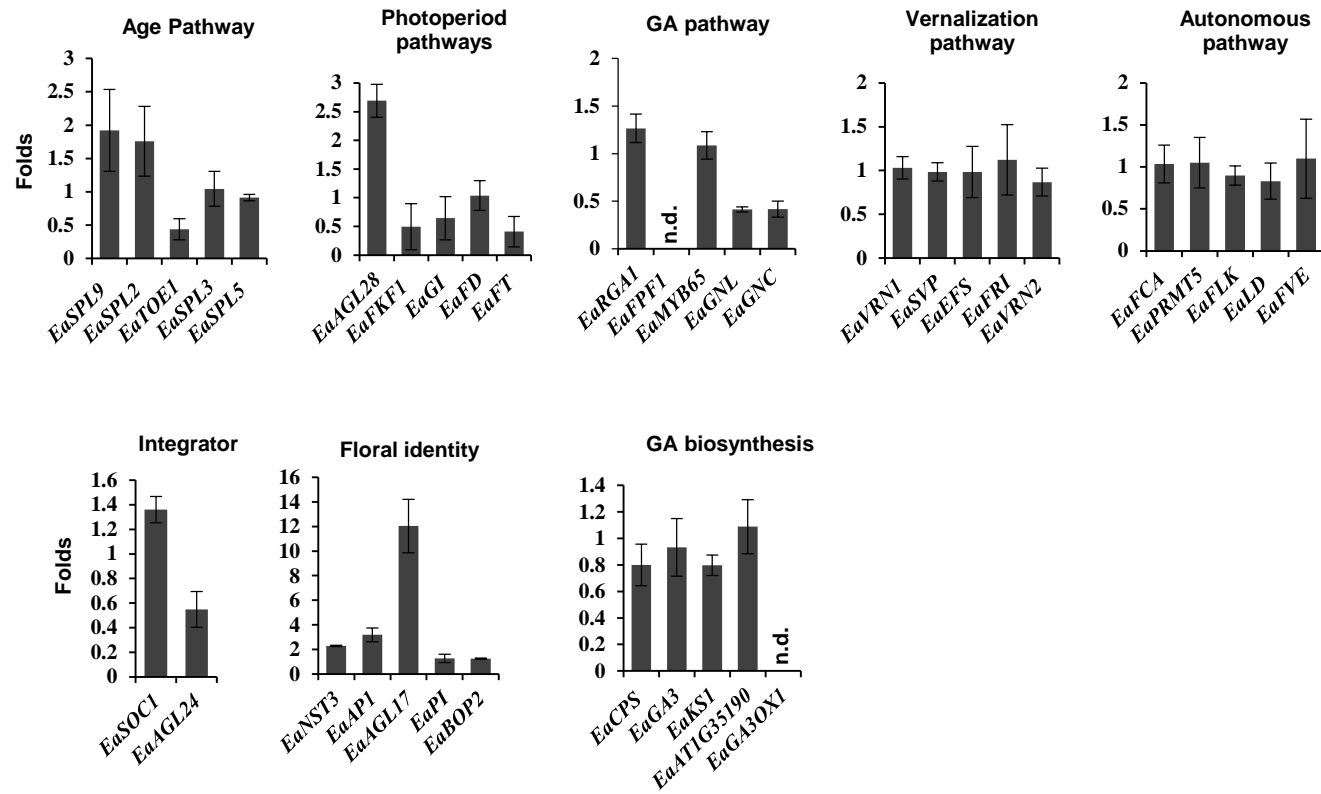

**Supplementary Figure S2. Results of qRT-PCR on selected genes from each floral inductive pathway or group for validating the DEG results in VG compared to HG plants.** Data plotted are the fold changes representing the relative difference in expression levels between VG plants and HG plants (as 1). Data shown is the average (n=3) ± s.d.. n.d.: not detected.

**a**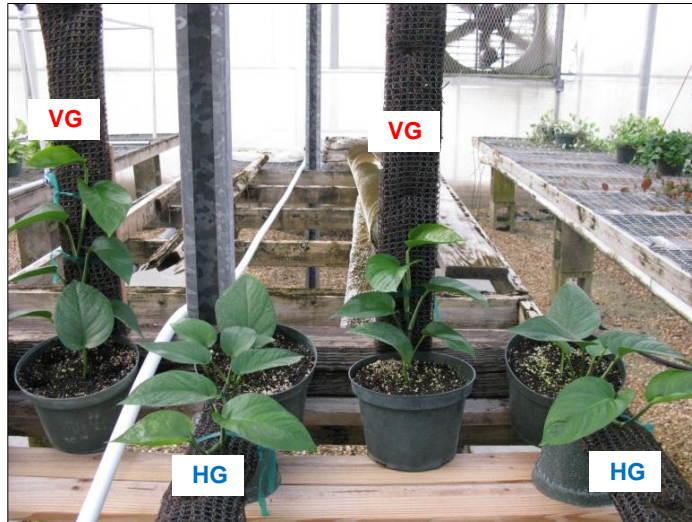**b**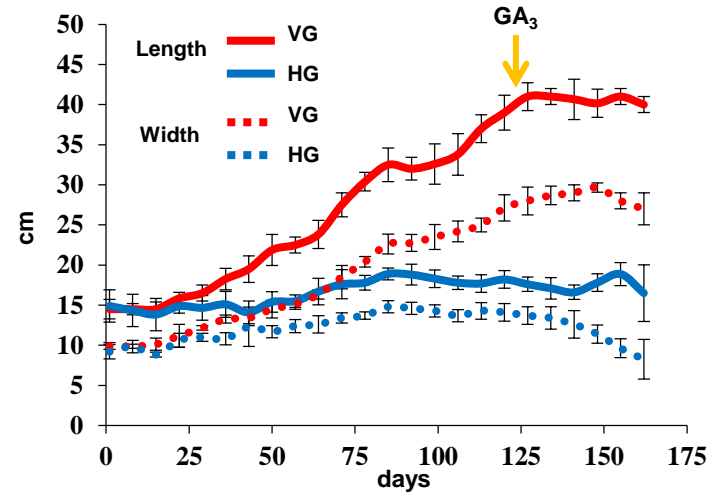

**Supplementary Figure S3. VG and HG plants used for GA<sub>3</sub> treatment.** (a) Green ‘Jade’ plants with 5 to 6 leaves propagated by cutting were used to set up on totem poles for vertical and horizontal growth studies. They were grown in a shaded greenhouse at the University of Florida Mid-Florida Research and Education Center, Apopka, FL, USA. (b) Leaf length (cm) and width (cm) of the latest fully expanded leaf were recorded weekly. Data plotted were the average (n=5) ± s.d.. Arrow indicates the time of GA<sub>3</sub> treatment.

**a** >LEAFY (Arabidopsis Accession #: NP\_200993.1)  
MDPEGFTSGLFRWNPTRALVQAPPVPPPLQQQPVTPQTA  
AFGMRLGGLEGLFGPYGIRFYTAAKIAELGFTASTLVGMK  
DEELEEMMNSLSHIFRWELLVGERYGIIAAVRAERRRLQ  
EEEEESSRRRHLLLSAAGDSGTHHALDALSQEGLSEEPV  
QQDQTDAAGNNGGGGGSGYWDAGQGKMKKQQQRRR  
KKPMLTSVETDEDVNEGEDDDGMDNGNGGSGLGTERQR  
EHPFIVTEPGEVARGKKNGLDYLFHLYEQREFLLQVQTI  
AKDRGEKCPTKVTNQVFRYAKKSGASYINKPKMRHYVH  
CYALHCLDEEASNALRRAFKERGENVGSWRQACYKPLV  
NIACRHGWDIDAVFNAHPRLSIWYVPTKLRQLCHLERNN  
AVAAAAALVGGISCTGSSTSGRGGCGGDDLRF

**b** >*EaLFY* (*E. aureum* Accession #: KP984525)  
GACGAATCAGGTGTTTCAGGTACGCGAAG  
GAGGCAGGAGCGAGCTACATCAACAAG  
CCCAAGATGCGGCACTACGTCCACTGCT  
ACGCCCTGCACTGCCTGGACGAGGAGGC  
GTCCAACGCACTGCGGCGGGCGTTCAAG  
GAGAAGGGCGAGAACGTGGGCGCGTGG  
CGGCAGGCCTGCTACCAGCCCCTGGTGG  
CCATGTCCGCCCGCCACGCCTGGGACGT  
CGACGCCCTCTTCAACTCCCACCCCGTC  
TCGCCATCTGGTACGTCCCCACCAAACCTG  
CGCCAGCTGTGCCA

**c** >*EaLFY* (97 aa)  
TNQVFRYAKEAGASYIN  
KPKMRHYVHCYALHCL  
DEEASNALRRAFKEKGE  
NVGAWRQACYQPLVA  
MSARHAWDVDALFNH  
PRLAIWYVPTKLRQLC

**d**  
AtLFY TNQVFRYAKKSGASYINKPKMRHYVHCYALHCLDEEASNALRRAFKERGENVGSWRQACY 60  
EaLFY TNQVFRYAKEAGASYINKPKMRHYVHCYALHCLDEEASNALRRAFKEKGENVGAWRQACY 60  
\*\*\*\*\*:\*\*\*\*\*:\*\*\*\*\*:\*\*\*\*\*:\*\*\*\*\*  
AtLFY KPLVNIACRHGWDIDAVFNAHPRLSIWYVPTKLRQLC 97  
EaLFY QPLVMSARHAWDVDALFNHPRLAIWYVPTKLRQLC 97  
:\*\*\* :. \*.\*\*:\*:\*:\*:\*:\*:\*:\*:\*:\*:\*

**Supplementary Figure S4. Amplified partial genomic DNA sequence of *EaLFY*.** (a) The underlined region of Arabidopsis LEAFY amino acid sequence represents the conserved region of *LFY* exon 3 among 19 monocot and dicot species used for designing two degenerated primers *EaLFYF*/*EaLFYR*. (b) Amplified 294 bp *EaLFY* genomic sequences. The first and last codons are underlined. (c) Derived amino acid sequence of *EaLFY*. (d) CLUSTAL 2.1 multiple sequence alignment of Arabidopsis LEAFY (*AtLFY*) and *EaLFY* showing 86% identity.

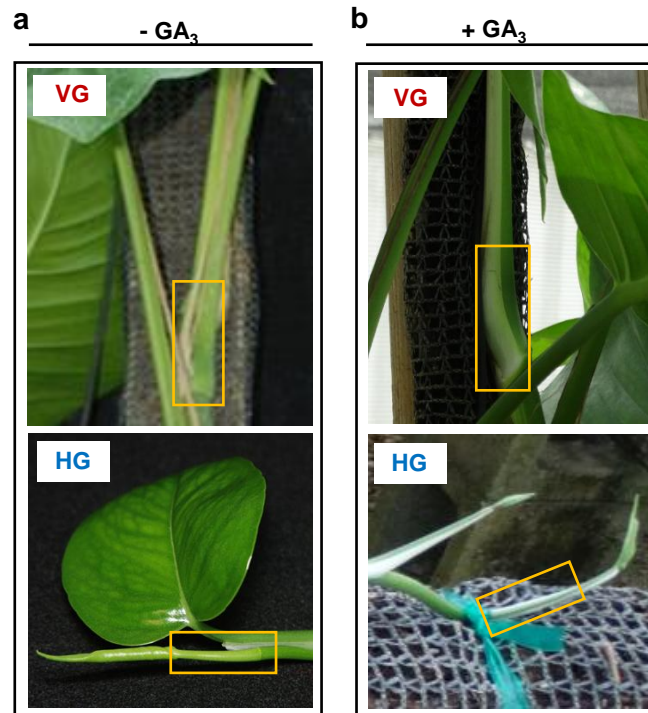

**Supplementary Figure S5. Photographs showing regions used for harvesting young shoots. (a)** Young shoots of VG and HG plants without GA<sub>3</sub> treatment (-GA<sub>3</sub>) were used for both gene expression analysis and GA measurement. **(b)** Young shoots of VG and HG plants with GA<sub>3</sub> treatment (+ GA<sub>3</sub>) were used for gene expression analysis.

**Supplementary Table S1a. Summary of transcriptomic reads by 454 sequencing platform<sup>a</sup>**

|                                       |             |
|---------------------------------------|-------------|
| Number of reads                       | 579,096     |
| Minimum read length (bp)              | 40          |
| Maximum read length (bp)              | 1,252       |
| Mean read length before trimming (bp) | 388         |
| Total length (bp)                     | 224,619,644 |

<sup>a</sup>: Mixed RNAs prepared from young shoots including leaves, petioles and stems as well as young roots were used.

**Supplementary Table S1b. Summary of Illumina clean reads of ‘Marble Queen’ leaves<sup>a</sup>**

|                | MG            | MW            | Mixed RNA sample | Total         |
|----------------|---------------|---------------|------------------|---------------|
| Reads number   | 35,067,199    | 32,265,993    | 28,478,946       | 95,812,138    |
| Bases in total | 2,384,569,532 | 2,194,087,524 | 1,452,426,246    | 6,031,083,302 |

<sup>a</sup>: MG: ‘Marble Queen’ green section tissues; MW: ‘Marble Queen’ white section tissues. Mixed RNA sample: equal amount of total RNA from MG and MW was used.

**Supplementary Table S1c. Summary of transcripts assembled**

| Count                            | 454+Illumina (leaf) |
|----------------------------------|---------------------|
| Total reads                      | 96,391,234          |
| Average read length (bp)         | 64.9                |
| Total bases                      | 6,255,702,946       |
| Reads aligned                    | 71,839,267          |
| Average aligned read length (bp) | 62.0                |
| Aligned bases                    | 4,732,256,144       |
| Number of contigs                | 41,059              |
| Average contig length (bp)       | 1,049               |
| N50 contig size (bp)             | 1,135               |
| Largest contig size (bp)         | 13,055              |

**Supplementary Table S4. DEG analysis results of 147 orthologs of *Arabidopsis* flower-related genes in VG and HG plants<sup>a</sup>.**

| <i>At</i> gene name        | <i>At</i> Locus ID | <i>Ea</i> gene name         | VG     | HG     | LogFC | LogCPM | <i>P</i> value | FDR      |
|----------------------------|--------------------|-----------------------------|--------|--------|-------|--------|----------------|----------|
| Age pathway                |                    |                             |        |        |       |        |                |          |
| <i>TOE1</i> <sup>b,c</sup> | AT2G28550.1        | <i>EaTOE1</i> <sup>d</sup>  | 429.0  | 785.3  | -1.09 | 4.60   | 7.17E-09       | 8.68E-07 |
| <i>SPL9</i>                | AT2G42200.1        | <i>EaSPL9</i> <sup>d</sup>  | 358.3  | 166.0  | 0.94  | 3.29   | 1.90E-06       | 0.000136 |
| <i>SPL15</i>               | AT3G57920.1        | <i>EaSPL15</i>              | 358.3  | 166.0  | 0.94  | 3.29   | 1.90E-06       | 0.000136 |
| <i>SPL2</i>                | AT5G43270.1        | <i>EaSPL2</i> <sup>d</sup>  | 885.3  | 450.0  | 0.78  | 4.64   | 3.45E-05       | 0.001741 |
| <i>SPL10</i>               | AT1G27370.1        | <i>EaSPL10</i>              | 885.3  | 450.0  | 0.78  | 4.64   | 3.45E-05       | 0.001741 |
| <i>SPL11</i>               | AT1G27360.1        | <i>EaSPL11</i>              | 885.3  | 450.0  | 0.78  | 4.64   | 3.45E-05       | 0.001741 |
| <i>SPL8</i>                | AT1G02065.1        | <i>EaSPL8</i> <sup>e</sup>  | 57.3   | 24.0   | 1.03  | 0.67   | 0.000193       | 0.007546 |
| <i>SPL8</i>                | AT1G02065.1        | <i>EaSPL8</i> <sup>e</sup>  | 30.0   | 14.3   | 0.86  | -0.14  | 0.009192       | 0.144582 |
| <i>SPL6</i>                | AT1G69170.1        | <i>EaSPL6</i> <sup>e</sup>  | 111.0  | 73.3   | 0.36  | 1.82   | 0.116357       | 0.605206 |
| <i>SPL5</i>                | AT3G15270.1        | <i>EaSPL5</i> <sup>d</sup>  | 607.7  | 470.7  | 0.18  | 4.37   | 0.344013       | 0.894944 |
| <i>SPL4</i>                | AT1G53160.1        | <i>EaSPL4</i>               | 607.7  | 470.7  | 0.18  | 4.37   | 0.344013       | 0.894944 |
| <i>AP2</i>                 | AT4G36920.1        | <i>EaAP2</i>                | 218.0  | 207.3  | -0.13 | 3.04   | 0.506005       | 0.981455 |
| <i>SMZ/SNZ</i>             | AT2G39250.1        | <i>EaSMZ/SNZ</i>            | 218.0  | 207.3  | -0.13 | 3.04   | 0.506005       | 0.981455 |
| <i>SPL13</i>               | AT5G50670.1        | <i>EaSPL13</i> <sup>e</sup> | 309.7  | 252.7  | 0.08  | 3.43   | 0.681925       | 1        |
| <i>SPL13</i>               | AT5G50670.1        | <i>EaSPL13</i> <sup>e</sup> | 72.3   | 67.3   | -0.10 | 1.45   | 0.693374       | 1        |
| <i>SPL3</i>                | AT2G33810.1        | <i>EaSPL3</i> <sup>d</sup>  | 2876.0 | 2372.7 | 0.08  | 6.65   | 0.674808       | 1        |
| <i>SPL6</i>                | AT1G69170.1        | <i>EaSPL6</i> <sup>e</sup>  | 309.7  | 249.3  | 0.11  | 3.41   | 0.59873        | 1        |
| <i>SPL8</i>                | AT1G02065.1        | <i>EaSPL8</i> <sup>e</sup>  | 111.7  | 91.0   | 0.07  | 2.00   | 0.789434       | 1        |
| <i>TOE2</i>                | AT5G60120.1        | <i>EaTOE2</i>               | 886.0  | 801.7  | -0.08 | 5.02   | 0.670706       | 1        |
| Autonomous pathway         |                    |                             |        |        |       |        |                |          |
| <i>FPA</i>                 | AT2G43410.1        | <i>EaFPA</i>                | 130.3  | 94.7   | 0.26  | 2.13   | 0.239574       | 0.800147 |
| <i>REF6</i>                | AT3G48430.1        | <i>EaREF6</i>               | 378.0  | 384.7  | -0.22 | 3.88   | 0.258182       | 0.819836 |
| <i>FCA</i>                 | AT4G16280.1        | <i>EaFCA</i> <sup>d</sup>   | 484.3  | 402.0  | 0.07  | 4.08   | 0.706796       | 1        |
| <i>PRMT5</i>               | AT4G31120.1        | <i>EaPRMT5</i> <sup>d</sup> | 3161.7 | 2655.0 | 0.07  | 6.79   | 0.707172       | 1        |
| <i>FLD</i>                 | AT3G10390.1        | <i>EaFLD</i>                | 805.7  | 731.0  | -0.06 | 4.88   | 0.748473       | 1        |
| <i>FLK</i>                 | AT3G04610.1        | <i>EaFLK</i> <sup>d</sup>   | 3104.3 | 2674.3 | 0.04  | 6.78   | 0.846248       | 1        |
| <i>FPA</i>                 | AT2G43410.1        | <i>EaFPA</i>                | 914.3  | 819.0  | -0.04 | 5.05   | 0.826375       | 1        |
| <i>FVE</i>                 | AT2G19520.1        | <i>EaFVE</i> <sup>d</sup>   | 4268.7 | 3646.7 | 0.03  | 7.23   | 0.879229       | 1        |
| <i>FY</i>                  | AT5G13480.1        | <i>EaFY</i>                 | 952.0  | 775.3  | 0.09  | 5.04   | 0.617909       | 1        |
| <i>LD</i>                  | AT4G02560.1        | <i>EaLD</i> <sup>d</sup>    | 890.7  | 776.3  | 0.00  | 5.00   | 0.982486       | 1        |
| Floral identity genes      |                    |                             |        |        |       |        |                |          |
| <i>AGL17</i>               | AT2G22630.1        | <i>EaAGL17</i> <sup>d</sup> | 112.7  | 8.3    | 3.51  | 1.17   | 6.07E-31       | 1.53E-27 |
| <i>API</i>                 | AT1G69120.1        | <i>EaAPI</i> <sup>d</sup>   | 129.7  | 38.3   | 1.55  | 1.67   | 4.90E-11       | 8.67E-09 |
| <i>AGL2</i>                | AT5G15800.1        | <i>EaAGL2</i>               | 129.7  | 38.3   | 1.55  | 1.67   | 4.90E-11       | 8.67E-09 |
| <i>AGL3</i>                | AT2G03710.1        | <i>EaAGL3</i>               | 129.7  | 38.3   | 1.55  | 1.67   | 4.90E-11       | 8.67E-09 |
| <i>AGL4</i>                | AT3G02310.1        | <i>EaAGL4</i>               | 129.7  | 38.3   | 1.55  | 1.67   | 4.90E-11       | 8.67E-09 |
| <i>AGL6</i>                | AT2G45650.1        | <i>EaAGL6</i>               | 129.7  | 38.3   | 1.55  | 1.67   | 4.90E-11       | 8.67E-09 |
| <i>AGL9</i>                | AT1G24260.1        | <i>EaAGL9</i>               | 129.7  | 38.3   | 1.55  | 1.67   | 4.90E-11       | 8.67E-09 |
| <i>AGL10/CAL1</i>          | AT1G26310.1        | <i>EaAGL10/EaCAL1</i>       | 129.7  | 38.3   | 1.55  | 1.67   | 4.90E-11       | 8.67E-09 |



|                            |             |                                    |           |        |       |       |          |          |
|----------------------------|-------------|------------------------------------|-----------|--------|-------|-------|----------|----------|
| <i>PI</i>                  | AT5G20240.1 | <i>EaPI</i> <sup>d</sup>           | 62.7      | 30.0   | 0.88  | 0.85  | 0.000569 | 0.018433 |
| <i>FUL/AGL8</i>            | AT5G60910.1 | <i>EaFUL/EaAGL8</i>                | 16.7      | 5.0    | 1.51  | -1.04 | 0.000937 | 0.027242 |
| <i>NST1</i>                | AT2G46770.1 | <i>EaNST1</i>                      | 36.0      | 14.3   | 1.07  | 0.04  | 0.00117  | 0.03251  |
| <i>NST3</i>                | AT1G32770.1 | <i>EaNST3</i> <sup>d</sup>         | 36.0      | 14.3   | 1.07  | 0.04  | 0.00117  | 0.03251  |
| <i>DDF1</i>                | AT1G12610.1 | <i>EaDDF1</i>                      | 76.7      | 101.7  | -0.63 | 1.83  | 0.004167 | 0.083805 |
| <i>AG</i>                  | AT4G18960.1 | <i>EaAG</i>                        | 557.7     | 339.3  | 0.53  | 4.08  | 0.005592 | 0.103145 |
| <i>AGL11/STK</i>           | AT4G09960.1 | <i>EaAGL11/EaSTK</i>               | 557.7     | 339.3  | 0.53  | 4.08  | 0.005592 | 0.103145 |
| <i>AGL14</i>               | AT4G11880.1 | <i>EaAGL14</i>                     | 557.7     | 339.3  | 0.53  | 4.08  | 0.005592 | 0.103145 |
| <i>AGL15</i>               | AT5G13790.1 | <i>EaAGL15</i>                     | 557.7     | 339.3  | 0.53  | 4.08  | 0.005592 | 0.103145 |
| <i>AGL19</i>               | AT4G22950.1 | <i>EaAGL19</i>                     | 557.7     | 339.3  | 0.53  | 4.08  | 0.005592 | 0.103145 |
| <i>AGL42</i>               | AT5G62165.1 | <i>EaAGL42</i>                     | 557.7     | 339.3  | 0.53  | 4.08  | 0.005592 | 0.103145 |
| <i>AGL71</i>               | AT5G51870.1 | <i>EaAGL71</i>                     | 557.7     | 339.3  | 0.53  | 4.08  | 0.005592 | 0.103145 |
| <i>AGL72</i>               | AT5G51860.1 | <i>EaAGL72</i>                     | 557.7     | 339.3  | 0.53  | 4.08  | 0.005592 | 0.103145 |
| <i>AGL18</i>               | AT3G57390.1 | <i>EaAGL18</i>                     | 557.7     | 339.3  | 0.53  | 4.08  | 0.005592 | 0.103145 |
| <i>AP3</i>                 | AT3G54340.1 | <i>EaAP3</i>                       | 4.7       | 9.3    | -1.18 | -1.53 | 0.022435 | 0.256333 |
| <i>LLP12/CRN/SOL2</i>      | AT5G13290.1 | <i>EaLLP12/EaCRN/EaSOL2</i>        | 147.7     | 162.0  | -0.34 | 2.60  | 0.093812 | 0.551095 |
| <i>LMII</i>                | AT5G03790.1 | <i>EaLMII</i> <sup>e</sup>         | 399.7     | 415.7  | -0.24 | 3.98  | 0.221318 | 0.781607 |
| <i>LMII</i>                | AT5G03790.1 | <i>EaLMII</i> <sup>e</sup>         | 799.0     | 794.7  | -0.19 | 4.94  | 0.297594 | 0.855573 |
| <i>BOP2</i>                | AT2G41370.1 | <i>EaBOP2</i> <sup>d</sup>         | 158.0     | 120.0  | 0.20  | 2.43  | 0.351421 | 0.898767 |
| <i>AGL12</i>               | AT1G71692.1 | <i>EaAGL12</i>                     | 181.0     | 177.0  | -0.16 | 2.79  | 0.442208 | 0.952396 |
| <i>BOP1</i>                | AT3G57130.1 | <i>EaBOP1</i>                      | 250.3     | 201.3  | 0.12  | 3.12  | 0.563205 | 0.998487 |
| <i>CLII/</i>               |             | <i>EaCLII/</i>                     |           |        |       |       |          |          |
| <i>RPK2/TOAD2</i>          | AT3G02130.1 | <i>EaRPK2/EaTOAD2</i> <sup>e</sup> | 233.3     | 213.3  | -0.08 | 3.12  | 0.685353 | 1        |
| <i>CLII/</i>               |             | <i>EaCLII/</i>                     |           |        |       |       |          |          |
| <i>RPK2/TOAD2</i>          | AT3G02130.1 | <i>EaRPK2/EaTOAD2</i> <sup>e</sup> | 224.3     | 200.3  | -0.02 | 3.03  | 0.954001 | 1        |
| <i>FLY1</i>                | AT4G28370.1 | <i>EaFLY1</i>                      | 171.3     | 137.7  | 0.08  | 2.58  | 0.734286 | 1        |
| <i>FLY2</i>                | AT2G20650.1 | <i>EaFLY2</i>                      | 171.3     | 137.7  | 0.08  | 2.58  | 0.734286 | 1        |
| <i>IFL</i>                 | AT5G60690.1 | <i>EaIFL</i>                       | 1360.3    | 1143.0 | 0.04  | 5.58  | 0.850185 | 1        |
| <i>LMII</i>                | AT5G03790.1 | <i>EaLMII</i> <sup>e</sup>         | 5118.0    | 4442.0 | -0.01 | 7.52  | 0.975997 | 1        |
| <i>LMII</i>                | AT5G03790.1 | <i>EaLMII</i> <sup>e</sup>         | 264.3     | 228.7  | -0.00 | 3.26  | 0.992052 | 1        |
| <i>LMII</i>                | AT5G03790.1 | <i>EaLMII</i> <sup>e</sup>         | 359.3     | 319.3  | -0.04 | 3.71  | 0.840753 | 1        |
| <i>PI</i>                  | AT5G20240.1 | <i>EaPI</i>                        | 296.3     | 247.3  | 0.06  | 3.38  | 0.746256 | 1        |
| <i>SEU</i>                 | AT1G43850.1 | <i>EaSEU</i>                       | 1034.7    | 879.0  | 0.03  | 5.19  | 0.877699 | 1        |
| <i>TFL1</i>                | AT5G03840.1 | <i>EaTFL1</i>                      | 152.3     | 126.7  | 0.10  | 2.40  | 0.61737  | 1        |
| <i>WDR55</i>               | AT2G34260.1 | <i>EaWDR55</i>                     | 1109.3    | 922.0  | 0.07  | 5.26  | 0.716504 | 1        |
| <i>LFY</i>                 | AT5G61850   | <i>EaLFY</i>                       | Not found |        |       |       |          |          |
| <b>Integrator genes</b>    |             |                                    |           |        |       |       |          |          |
| <i>SOC1</i>                | AT2G45660.1 | <i>EaSOC1</i> <sup>d</sup>         | 557.7     | 339.3  | 0.53  | 4.08  | 0.01     | 0.103145 |
| <i>AGL24</i>               | AT4G24540.1 | <i>EaAGL24</i> <sup>d</sup>        | 667.7     | 660.3  | -0.18 | 4.67  | 0.36     | 0.901101 |
| <b>Photoperiod pathway</b> |             |                                    |           |        |       |       |          |          |
| <i>MFT</i>                 | AT1G18100.1 | <i>EaMFT</i>                       | 28.0      | 1.0    | 4.43  | -0.72 | 3.91E-15 | 1.46E-12 |
| <i>FKF1</i>                | AT1G68050.1 | <i>EaFKF1</i> <sup>de</sup>        | 628.0     | 1201.3 | -1.09 | 5.21  | 5.52E-09 | 6.85E-07 |
| <i>AGL28</i>               | AT1G01530.1 | <i>EaAGL28</i> <sup>d</sup>        | 1831.7    | 844.7  | 0.88  | 5.65  | 2.01E-06 | 0.000143 |
| <i>FT</i>                  | AT1G65480.1 | <i>EaFT</i> *                      | 16.7      | 39.0   | -1.39 | 0.21  | 5.95E-06 | 0.000374 |

|                  |             |                                  |        |        |       |       |          |          |
|------------------|-------------|----------------------------------|--------|--------|-------|-------|----------|----------|
| <i>TSF</i>       | AT4G20370.1 | <i>EaTSF</i>                     | 16.7   | 39.0   | -1.39 | 0.21  | 5.95E-06 | 0.000374 |
| <i>FKF1</i>      | AT1G68050.1 | <i>EaFKF1<sup>e</sup></i>        | 272.3  | 388.7  | -0.67 | 3.72  | 0.000586 | 0.018859 |
| <i>GI</i>        | AT1G22770.1 | <i>EaGI<sup>d,e</sup></i>        | 4190.3 | 5680.0 | -0.60 | 7.61  | 0.000997 | 0.028733 |
| <i>GI</i>        | AT1G22770.1 | <i>EaGI<sup>e</sup></i>          | 6124.7 | 8277.7 | -0.59 | 8.15  | 0.001273 | 0.034711 |
| <i>FD</i>        | AT4G35900.1 | <i>EaFD<sup>d,e</sup></i>        | 65.0   | 33.3   | 0.76  | 0.94  | 0.003268 | 0.070659 |
| <i>CO</i>        | AT5G15840.1 | <i>EaCO</i>                      | 11.7   | 16.7   | -0.73 | -0.69 | 0.045724 | 0.381351 |
| <i>COPI</i>      | AT2G32950.1 | <i>EaCOPI</i>                    | 361.0  | 389.3  | -0.34 | 3.88  | 0.073417 | 0.488922 |
| <i>CDF1</i>      | AT5G62430.1 | <i>EaCDF1</i>                    | 278.3  | 180.0  | 0.35  | 3.11  | 0.082985 | 0.520126 |
| <i>PFT1</i>      | AT1G25540.1 | <i>EaPFT1</i>                    | 2007.0 | 1434.0 | 0.27  | 6.02  | 0.138052 | 0.646008 |
| <i>PhyA</i>      | AT1G09570.1 | <i>EaPhyA</i>                    | 2566.3 | 2633.7 | -0.25 | 6.65  | 0.173625 | 0.709623 |
| <i>PhyB</i>      | AT2G18790.1 | <i>EaPhyB<sup>e</sup></i>        | 374.0  | 385.7  | -0.23 | 3.89  | 0.229679 | 0.789765 |
| <i>FTIP1</i>     | AT5G06850.1 | <i>EaFTIP1</i>                   | 357.7  | 265.7  | 0.22  | 3.58  | 0.270946 | 0.835217 |
| <i>CRY1</i>      | AT4G08920.1 | <i>EaCRY1</i>                    | 3929.3 | 3691.0 | -0.11 | 7.20  | 0.538607 | 0.991724 |
| <i>ATC</i>       | AT2G27550.1 | <i>EaATC</i>                     | 152.3  | 126.7  | 0.10  | 2.40  | 0.61737  | 1        |
| <i>BFT</i>       | AT5G62040.1 | <i>EaBFT</i>                     | 152.3  | 126.7  | 0.10  | 2.40  | 0.61737  | 1        |
| <i>CRY2</i>      | AT1G04400.1 | <i>EaCRY2</i>                    | 2729.3 | 2274.0 | 0.07  | 6.58  | 0.700354 | 1        |
| <i>ELF6</i>      | AT5G04240.1 | <i>EaELF6</i>                    | 196.7  | 173.7  | -0.04 | 2.85  | 0.835227 | 1        |
| <i>FD</i>        | AT4G35900.1 | <i>EaFD<sup>e</sup></i>          | 109.7  | 92.0   | 0.04  | 1.98  | 0.893786 | 1        |
| <i>ADO1/FKL2</i> | AT5G57360.1 | <i>EaADO1/EaFKL2<sup>e</sup></i> | 660.0  | 544.3  | 0.08  | 4.52  | 0.68718  | 1        |
| <i>ADO1/FKL2</i> | AT5G57360.1 | <i>EaADO1/EaFKL2<sup>e</sup></i> | 788.3  | 699.0  | -0.02 | 4.83  | 0.933448 | 1        |
| <i>PhyB</i>      | AT2G18790.1 | <i>EaPhyB<sup>e</sup></i>        | 362.7  | 312.7  | 0.02  | 3.70  | 0.908673 | 1        |
| <i>PhyC</i>      | AT5G35840.1 | <i>EaPhyC</i>                    | 1761.3 | 1535.7 | 0.02  | 5.98  | 0.900044 | 1        |
| <i>SPA1</i>      | AT2G46340.1 | <i>EaSPA1</i>                    | 283.0  | 237.3  | 0.06  | 3.32  | 0.773969 | 1        |
| <i>TEM1</i>      | AT1G25560.1 | <i>EaTEM1</i>                    | 97.0   | 85.3   | 0.03  | 1.83  | 0.845726 | 1        |
| <i>TEM2/RAV2</i> | AT1G68840.1 | <i>EaTEM2/EaRAV2</i>             | 97.0   | 85.3   | 0.03  | 1.83  | 0.845726 | 1        |

#### Vernalization pathway

|                   |             |                             |        |        |       |      |          |          |
|-------------------|-------------|-----------------------------|--------|--------|-------|------|----------|----------|
| <i>BRM</i>        | AT2G46020.1 | <i>EaBRM<sup>e</sup></i>    | 397.0  | 442.0  | -0.37 | 4.04 | 0.054448 | 0.421789 |
| <i>BRM</i>        | AT2G46020.1 | <i>EaBRM<sup>e</sup></i>    | 556.0  | 604.7  | -0.32 | 4.49 | 0.08628  | 0.528592 |
| <i>EMF1</i>       | AT5G11530.1 | <i>EaEMF1</i>               | 24.0   | 28.7   | -0.48 | 0.14 | 0.104773 | 0.580091 |
| <i>ELF3</i>       | AT2G25930.1 | <i>EaELF3</i>               | 222.0  | 238.3  | -0.28 | 3.17 | 0.160058 | 0.68568  |
| <i>VRN1</i>       | AT3G18990.1 | <i>EaVRN1<sup>d,e</sup></i> | 61.7   | 66.0   | -0.29 | 1.34 | 0.230591 | 0.789765 |
| <i>FLM/AGL27</i>  | AT1G77080.2 | <i>EaFLM/ EaAGL27</i>       | 667.7  | 660.3  | -0.17 | 4.67 | 0.356247 | 0.901101 |
| <i>SVP</i>        | AT2G22540.1 | <i>EaSVP<sup>e</sup></i>    | 667.7  | 660.3  | -0.17 | 4.67 | 0.356247 | 0.901101 |
| <i>FLC/AGL25</i>  | AT5G10140.1 | <i>EaFLC/ EaAGL25</i>       | 667.7  | 660.3  | -0.17 | 4.67 | 0.356247 | 0.901101 |
| <i>MAF2</i>       | AT5G65050.1 | <i>EaMAF2</i>               | 667.7  | 660.3  | -0.17 | 4.67 | 0.356247 | 0.901101 |
| <i>MAF3</i>       | AT5G65060.1 | <i>EaMAF3</i>               | 667.7  | 660.3  | -0.17 | 4.67 | 0.356247 | 0.901101 |
| <i>MAF4/AGL69</i> | AT5G65070.1 | <i>EaMAF4/ EaAGL69</i>      | 667.7  | 660.3  | -0.17 | 4.67 | 0.356247 | 0.901101 |
| <i>MAF5/AGL68</i> | AT5G65080.1 | <i>EaMAF5/ EaAGL68</i>      | 667.7  | 660.3  | -0.17 | 4.67 | 0.356247 | 0.901101 |
| <i>ELF7</i>       | AT1G79730.1 | <i>EaELF7</i>               | 299.0  | 291.7  | -0.17 | 3.51 | 0.373069 | 0.913347 |
| <i>SWI</i>        | AT2G33610.1 | <i>EaSWI</i>                | 322.3  | 254.3  | 0.14  | 3.47 | 0.480362 | 0.969466 |
| <i>SYD</i>        | AT2G28290.1 | <i>EaSYD</i>                | 259.7  | 246.0  | -0.14 | 3.29 | 0.487328 | 0.973101 |
| <i>LDLI/SWP1</i>  | AT1G62830.1 | <i>EaLDLI/ EaSWP1</i>       | 400.0  | 318.0  | 0.13  | 3.78 | 0.489921 | 0.974877 |
| <i>BRM</i>        | AT2G46020.1 | <i>EaBRM<sup>e</sup></i>    | 1089.3 | 1040.3 | -0.13 | 5.36 | 0.494815 | 0.976935 |

|                  |             |                            |        |        |       |       |          |          |
|------------------|-------------|----------------------------|--------|--------|-------|-------|----------|----------|
| <i>EFS</i>       | AT1G77300.1 | <i>EaEFS<sup>d</sup></i>   | 1494.0 | 1415.3 | -0.12 | 5.80  | 0.507713 | 0.981455 |
| <i>VIP3</i>      | AT4G29830.1 | <i>EaVIP3</i>              | 333.3  | 267.7  | 0.13  | 3.53  | 0.518662 | 0.983689 |
| <i>PIE1</i>      | AT3G12810.1 | <i>EaPIE1</i>              | 1053.3 | 839.0  | 0.11  | 5.18  | 0.547718 | 0.996212 |
| <i>ESD1/ARP6</i> | AT3G33520.1 | <i>EaESD1/EaARP6</i>       | 338.7  | 312.3  | -0.11 | 3.64  | 0.560551 | 0.998333 |
| <i>MEA</i>       | AT1G02580.1 | <i>EaMEA</i>               | 693.7  | 584.7  | 0.06  | 4.63  | 0.763444 | 1        |
| <i>ATX2</i>      | AT1G05830.1 | <i>EaATX2</i>              | 350.0  | 279.3  | 0.11  | 3.60  | 0.591241 | 1        |
| <i>UBC1</i>      | AT1G14400.1 | <i>EaUBC1</i>              | 4390.0 | 3964.0 | -0.04 | 7.32  | 0.844097 | 1        |
| <i>VIP5</i>      | AT1G61040.1 | <i>EaVIP5</i>              | 1526.3 | 1264.0 | 0.08  | 5.73  | 0.681785 | 1        |
| <i>UBC2</i>      | AT2G02760.1 | <i>EaUBC2</i>              | 4390.0 | 3964.0 | -0.04 | 7.32  | 0.844097 | 1        |
| <i>ELF8</i>      | AT2G06210.1 | <i>EaELF8</i>              | 2502.3 | 2222.7 | -0.03 | 6.50  | 0.872752 | 1        |
| <i>SVP</i>       | AT2G22540.1 | <i>EaSVP<sup>d,e</sup></i> | 1385.0 | 1179.7 | 0.04  | 5.61  | 0.832829 | 1        |
| <i>CLF</i>       | AT2G23380.1 | <i>EaCLF</i>               | 693.7  | 584.7  | 0.06  | 4.63  | 0.763444 | 1        |
| <i>ATX1</i>      | AT2G31650.1 | <i>EaATX1</i>              | 350.0  | 279.3  | 0.11  | 3.60  | 0.591241 | 1        |
| <i>ELF4</i>      | AT2G40080.1 | <i>EaELF4</i>              | 41.0   | 34.3   | 0.05  | 0.59  | 0.883057 | 1        |
| <i>BRM</i>       | AT2G46020.1 | <i>EaBRM<sup>e</sup></i>   | 1151.3 | 1071.3 | -0.09 | 5.42  | 0.61169  | 1        |
| <i>BSH/CHE1</i>  | AT3G17590.1 | <i>EaBSH/EaCHE1</i>        | 1097.7 | 955.3  | 0.00  | 5.28  | 0.994548 | 1        |
| <i>VRN1</i>      | AT3G18990.1 | <i>EaVRN1<sup>e</sup></i>  | 49.7   | 45.7   | -0.06 | 0.92  | 0.837546 | 1        |
| <i>FIE</i>       | AT3G20740.1 | <i>EaFIE</i>               | 1116.3 | 1015.0 | -0.05 | 5.35  | 0.782469 | 1        |
| <i>VIL1</i>      | AT3G24440.1 | <i>EaVIL1</i>              | 459.3  | 383.3  | 0.06  | 4.00  | 0.746145 | 1        |
| <i>FRI</i>       | AT4G00650.1 | <i>EaFRI<sup>d,e</sup></i> | 745.0  | 668.0  | -0.05 | 4.75  | 0.783395 | 1        |
| <i>FRI</i>       | AT4G00650.1 | <i>EaFRI<sup>e</sup></i>   | 330.3  | 282.0  | 0.03  | 3.55  | 0.888597 | 1        |
| <i>SWN/EZA1</i>  | AT4G02020.1 | <i>EaSWN/EaEZA1</i>        | 693.7  | 584.7  | 0.06  | 4.63  | 0.763444 | 1        |
| <i>VRN2</i>      | AT4G16845.1 | <i>EaVRN2<sup>d</sup></i>  | 1638.3 | 1472.7 | -0.06 | 5.89  | 0.745191 | 1        |
| <i>EMF1</i>      | AT5G11530.1 | <i>EaEMF1</i>              | 12.7   | 11.3   | -0.03 | -0.90 | 1        | 1        |
| <i>SWC6</i>      | AT5G37055.1 | <i>EaSWC6</i>              | 229.3  | 211.7  | -0.06 | 3.08  | 0.787716 | 1        |
| <i>EMF2</i>      | AT5G51230.1 | <i>EaEMF2</i>              | 1638.3 | 1472.7 | -0.06 | 5.89  | 0.745191 | 1        |
| <i>VIN3</i>      | AT5G57380.1 | <i>EaVIN3</i>              | 373.0  | 334.3  | -0.04 | 3.76  | 0.855417 | 1        |
| <i>MSI1</i>      | AT5G58230.1 | <i>EaMSI1</i>              | 1822.3 | 1632.7 | -0.04 | 6.04  | 0.837435 | 1        |
| <i>VIP4</i>      | AT5G61150.1 | <i>EaVIP4</i>              | 915.3  | 804.7  | -0.02 | 5.03  | 0.931436 | 1        |
| <i>UBC3</i>      | AT5G62540.1 | <i>EaUBC3</i>              | 4390.0 | 3964.0 | -0.04 | 7.32  | 0.844097 | 1        |
| <i>ELF5</i>      | AT5G62640.1 | <i>EaELF5</i>              | 198.7  | 165.7  | 0.05  | 2.81  | 0.821495 | 1        |

#### GA pathway

|                 |                    |                            |              |              |              |             |                 |                 |
|-----------------|--------------------|----------------------------|--------------|--------------|--------------|-------------|-----------------|-----------------|
| <i>GNL</i>      | <b>AT4G26150.1</b> | <i>EaGNL<sup>d,e</sup></i> | <b>56.0</b>  | <b>161.0</b> | <b>-1.70</b> | <b>2.11</b> | <b>2.34E-14</b> | <b>7.44E-12</b> |
| <i>GNC</i>      | <b>AT5G56860.1</b> | <i>EaGNC<sup>d</sup></i>   | <b>143.7</b> | <b>351.0</b> | <b>-1.48</b> | <b>3.29</b> | <b>2.07E-13</b> | <b>5.76E-11</b> |
| <i>GNL</i>      | <b>AT4G26150.1</b> | <i>EaGNL<sup>e</sup></i>   | <b>79.3</b>  | <b>163.7</b> | <b>-1.25</b> | <b>2.28</b> | <b>5.55E-09</b> | <b>6.87E-07</b> |
| <i>JAZ10</i>    | AT5G13220.1        | <i>EaJAZ10</i>             | 124.0        | 159.7        | -0.59        | 2.50        | 0.004614        | 0.089664        |
| <i>GAI</i>      | AT1G14920.1        | <i>EaGAI</i>               | 2638.7       | 1839.3       | 0.30         | 6.41        | 0.1067          | 0.584401        |
| <i>RGL1</i>     | AT1G66350.1        | <i>EaRGL1</i>              | 2638.7       | 1839.3       | 0.30         | 6.41        | 0.1067          | 0.584401        |
| <i>RGA1</i>     | AT2G01570.1        | <i>EaRGA1<sup>d</sup></i>  | 2638.7       | 1839.3       | 0.30         | 6.41        | 0.1067          | 0.584401        |
| <i>RGL2</i>     | AT3G03450.1        | <i>EaRGL2</i>              | 2638.7       | 1839.3       | 0.30         | 6.41        | 0.1067          | 0.584401        |
| <i>RGL3</i>     | AT5G17490.1        | <i>EaRGL3</i>              | 2638.7       | 1839.3       | 0.30         | 6.41        | 0.1067          | 0.584401        |
| <i>AtMYB101</i> | AT2G32460.1        | <i>EaMYB101</i>            | 109.3        | 117.7        | -0.30        | 2.14        | 0.164242        | 0.693669        |
| <i>AtMYB65</i>  | AT3G11440.1        | <i>EaMYB65<sup>d</sup></i> | 109.3        | 117.7        | -0.30        | 2.14        | 0.164242        | 0.693669        |

|                                         |             |                                           |        |        |       |       |          |          |
|-----------------------------------------|-------------|-------------------------------------------|--------|--------|-------|-------|----------|----------|
| <i>AtMYB33</i>                          | AT5G06100.1 | <i>EaMYB33</i>                            | 109.3  | 117.7  | -0.30 | 2.14  | 0.164242 | 0.693669 |
| <i>GID1</i>                             | AT3G05120.1 | <i>EaGID1</i>                             | 127.0  | 132.7  | -0.29 | 2.36  | 0.172475 | 0.708781 |
| <i>SPY</i>                              | AT3G11540.1 | <i>EaSPY</i>                              | 1342.3 | 1320.0 | -0.16 | 5.68  | 0.394737 | 0.927101 |
| <i>JAZ5</i>                             | AT1G17380.1 | <i>EaJAZ5</i>                             | 384.3  | 304.7  | 0.13  | 3.72  | 0.488642 | 0.973784 |
| <i>JAZ6</i>                             | AT1G72450.1 | <i>EaJAZ6</i>                             | 384.3  | 304.7  | 0.13  | 3.72  | 0.488642 | 0.973784 |
| <i>JAZ1</i>                             | AT1G19180.1 | <i>EaJAZ1</i>                             | 761.7  | 658.3  | 0.01  | 4.76  | 0.971806 | 1        |
| <i>AGL67</i>                            | AT1G77950.1 | <i>EaAGL67</i>                            | 49.0   | 44.7   | -0.08 | 0.90  | 0.740824 | 1        |
| <i>PKL</i>                              | AT2G25170.1 | <i>EaPKL</i> <sup>e</sup>                 | 799.3  | 725.3  | -0.05 | 4.87  | 0.801338 | 1        |
| <i>PKL</i>                              | AT2G25170.1 | <i>EaPKL</i> <sup>e</sup>                 | 2084.3 | 1813.0 | -0.00 | 6.22  | 0.989899 | 1        |
| <i>GRAS family transcription factor</i> | AT2G37650.1 | <i>EaGRAS family transcription factor</i> | 424.3  | 342.7  | 0.09  | 3.88  | 0.644304 | 1        |
| <i>FPF1</i>                             | AT5G24860.1 | <i>EaFPF1</i> <sup>d</sup>                | 0.0    | 0.0    | 0.00  | -3.71 | 1        | 1        |

<sup>a</sup>: *At*: *A. thaliana*; *Ea*: *E. aureum*; FC: fold change; CPM: read counts per million reads; FDR: false discovery rate. <sup>b</sup>: Gene full names and corresponding contigs are listed in supplementary table S7. <sup>c</sup>: FDR<0.05 is bold. <sup>d</sup>: Selected for qRT-PCR analysis. <sup>e</sup>: Genes with multiple matched contigs.

**Supplementary Table S5a. Summary of Illumina clean reads of ‘Jade’ VG and HG shoots<sup>a</sup>**

|                           | VG1        | VG2        | VG3        | HG1        | HG2        | HG3        | Total       |
|---------------------------|------------|------------|------------|------------|------------|------------|-------------|
| Reads number              | 31123913   | 28548121   | 26858706   | 27466625   | 30513093   | 21407622   | 165918080   |
| Unmapped reads            | 7944793    | 7344331    | 7001899    | 7460861    | 7886162    | 5811986    | 43450032    |
| Bases in total            | 3066980460 | 2813639125 | 2645293654 | 2703821121 | 3006510903 | 2108534014 | 16344779277 |
| Bases in total (unmapped) | 778205536  | 719570942  | 685831994  | 730324520  | 772839329  | 569059479  | 4255831800  |

<sup>a</sup>: VG: vertical growth; HG: horizontal growth. The Arabic numerals next to VG and HG indicate three different plants used for sequencing.

**Supplementary Table S5b. Summary of transcripts assembled from unmapped data**

|                            |               |
|----------------------------|---------------|
| Total reads                | 43,450,032    |
| Average read length (bp)   | 68            |
| Total bases                | 4,255,831,800 |
| Aligned bases              | 25,002,043    |
| Number of contigs          | 54,712        |
| Average contig length (bp) | 457           |
| N50 contig size (bp)       | 514           |
| Largest contig size (bp)   | 8,567         |

**Supplementary Table S6. DEG analysis results of 24 orthologs of *Arabidopsis* GA biosynthesis genes in VG and HG plants<sup>a</sup>**

| <i>At</i> gene name              | <i>At</i> Locus ID | <i>Ea</i> gene name            | VG    | HG    | LogFC        | LogCPM      | <i>P</i> value  | FDR             |
|----------------------------------|--------------------|--------------------------------|-------|-------|--------------|-------------|-----------------|-----------------|
| <b>AT1G14120.1<sup>b,c</sup></b> | <b>AT1G14120.1</b> | <b><i>EaAT1G14120</i></b>      | 39.7  | 61.3  | <b>-0.84</b> | <b>1.05</b> | <b>0.000783</b> | <b>0.023595</b> |
| AT1G14130.1                      | AT1G14130.1        | <i>EaAT1G14130</i>             | 793.3 | 897.0 | -0.38        | 5.03        | 0.043685        | 0.370909        |
| AT4G21690.1                      | AT4G21690.1        | <i>EaAT4G21690</i>             | 793.3 | 897.0 | -0.38        | 5.03        | 0.043685        | 0.370909        |
| <i>KS1</i>                       | AT1G79460.1        | <i>EaKS1<sup>d</sup></i>       | 468.7 | 524.0 | -0.34        | 4.26        | 0.074051        | 0.490749        |
| AT3G19010.1                      | AT3G19010.1        | <i>EaAT3G19010</i>             | 261.7 | 189.3 | 0.27         | 3.10        | 0.17111         | 0.706718        |
| AT1G35190.1                      | AT1G35190.1        | <i>EaAT1G35190<sup>d</sup></i> | 296.3 | 224.7 | 0.22         | 3.32        | 0.261283        | 0.823271        |
| <i>GA2ox2</i>                    | AT1G30040.1        | <i>EaGA2ox2</i>                | 45.3  | 48.3  | -0.27        | 0.90        | 0.320581        | 0.875759        |
| <i>GA2ox6</i>                    | AT1G02400.1        | <i>EaGA2ox6</i>                | 45.3  | 48.3  | -0.27        | 0.90        | 0.320581        | 0.875759        |
| AT4G23340.1                      | AT4G23340.1        | <i>EaAT4G23340</i>             | 95.7  | 73.0  | 0.20         | 1.72        | 0.364453        | 0.909479        |
| AT5G51310.1                      | AT5G51310.1        | <i>EaAT5G51310</i>             | 7.3   | 4.3   | 0.54         | -1.76       | 0.421071        | 0.940553        |
| <i>GA20ox1</i>                   | AT4G25420.1        | <i>EaGA20ox1</i>               | 19.3  | 20.0  | -0.26        | -0.27       | 0.444194        | 0.952396        |
| <i>GA20ox2</i>                   | AT5G51810.1        | <i>EaGA20ox2</i>               | 19.3  | 20.0  | -0.26        | -0.27       | 0.444194        | 0.952396        |
| <i>GA20ox3</i>                   | AT5G07200.1        | <i>EaGA20ox3</i>               | 19.3  | 20.0  | -0.26        | -0.27       | 0.444194        | 0.952396        |
| <i>GA20ox4</i>                   | AT1G60980.1        | <i>EaGA20ox4</i>               | 19.3  | 20.0  | -0.26        | -0.27       | 0.444194        | 0.952396        |
| <i>GA20ox5</i>                   | AT1G44090.1        | <i>EaGA20ox5</i>               | 19.3  | 20.0  | -0.26        | -0.27       | 0.444194        | 0.952396        |
| <i>KAO1</i>                      | AT1G05160.1        | <i>EaKAO1</i>                  | 58.0  | 57.7  | -0.18        | 1.19        | 0.480754        | 0.969466        |
| <i>KAO2</i>                      | AT2G32440.1        | <i>EaKAO2</i>                  | 58.0  | 57.7  | -0.18        | 1.19        | 0.480754        | 0.969466        |
| AT1G80330.1                      | AT1G80330.1        | <i>EaAT1G80330</i>             | 0.0   | 0.0   | 0.00         | -3.71       | 1               | 1               |
| <i>CCR1</i>                      | AT1G15950.1        | <i>EaCCR1</i>                  | 338.3 | 294.7 | -0.03        | 3.61        | 0.86192         | 1               |
| <i>CCR2</i>                      | AT1G80820.1        | <i>EaCCR2</i>                  | 338.3 | 294.7 | -0.03        | 3.61        | 0.86192         | 1               |
| <i>CPS</i>                       | AT4G02780.1        | <i>EaCPS<sup>d</sup></i>       | 124.7 | 119.0 | -0.11        | 2.24        | 0.609502        | 1               |
| <i>GA3</i>                       | AT5G25900.1        | <i>EaGA3<sup>d</sup></i>       | 468.0 | 399.0 | 0.06         | 4.06        | 0.756214        | 1               |
| <i>GA3ox1</i>                    | AT1G15550.1        | <i>EaGA3ox1<sup>d</sup></i>    | 0.0   | 0.0   | 0.00         | -3.71       | 1               | 1               |
| <i>GA3ox2</i>                    | AT1G80340.1        | <i>EaGA3ox2</i>                | 0.0   | 0.0   | 0.00         | -3.71       | 1               | 1               |

<sup>a</sup>: *At*: *A. thaliana*; *Ea*: *E. aureum*; FC: fold change; CPM: read counts per million reads; FDR: false discovery rate. <sup>b</sup>: Gene full names and corresponding contigs are listed in supplementary table S7. <sup>c</sup>: FDR<0.05 is bold. <sup>d</sup>: Selected for qRT-PCR analysis.
